# Supplementary material for: Reconciling drainage and receiving basin signatures of the Godavari River system
Source: Copernicus journal article supplement (doi:10.5194/bg-15-3357-2018), 2018-06-07
Supplement: Supplementary file 1 [file bg-15-3357-2018-supplement.zip]

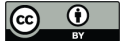

## *Supplement of*

# **Reconciling drainage and receiving basin signatures of the Godavari River system**

**Muhammed Ojoshogu Usman et al.**

*Correspondence to:* Muhammed Ojoshogu Usman ([muhammed.usman@erdw.ethz.ch](mailto:muhammed.usman@erdw.ethz.ch))

- [bg-15-3357-2018-supplement-title-page.pdf](#)
- [Fig. S1.pdf](#)
- [Fig. S2.pdf](#)
- [Supplementary Table and Figure Captions.pdf](#)
- [Table S1.xls](#)
- [Table S2.xlsx](#)

The copyright of individual parts of the supplement might differ from the CC BY 4.0 License.
