# Supplementary material for: Reconciling drainage and receiving basin signatures of the Godavari River system
Source: Copernicus journal article supplement (doi:10.5194/bg-15-3357-2018), 2018-06-07
Supplement: Supplementary file 2 [file bg-15-3357-2018-supplement.zip]

Archive with 6 entries (6 files):
- Table S1.xls
- bg-15-3357-2018-supplement-title-page.pdf
- Fig. S2.pdf
- Supplementary Table and Figure Captions.pdf
- Table S2.xlsx
- Fig. S1.pdf
