# Supplementary figures and images for: Reconciling drainage and receiving basin signatures of the Godavari River system
Source: Copernicus journal article supplement (doi:10.5194/bg-15-3357-2018), 2018-06-07

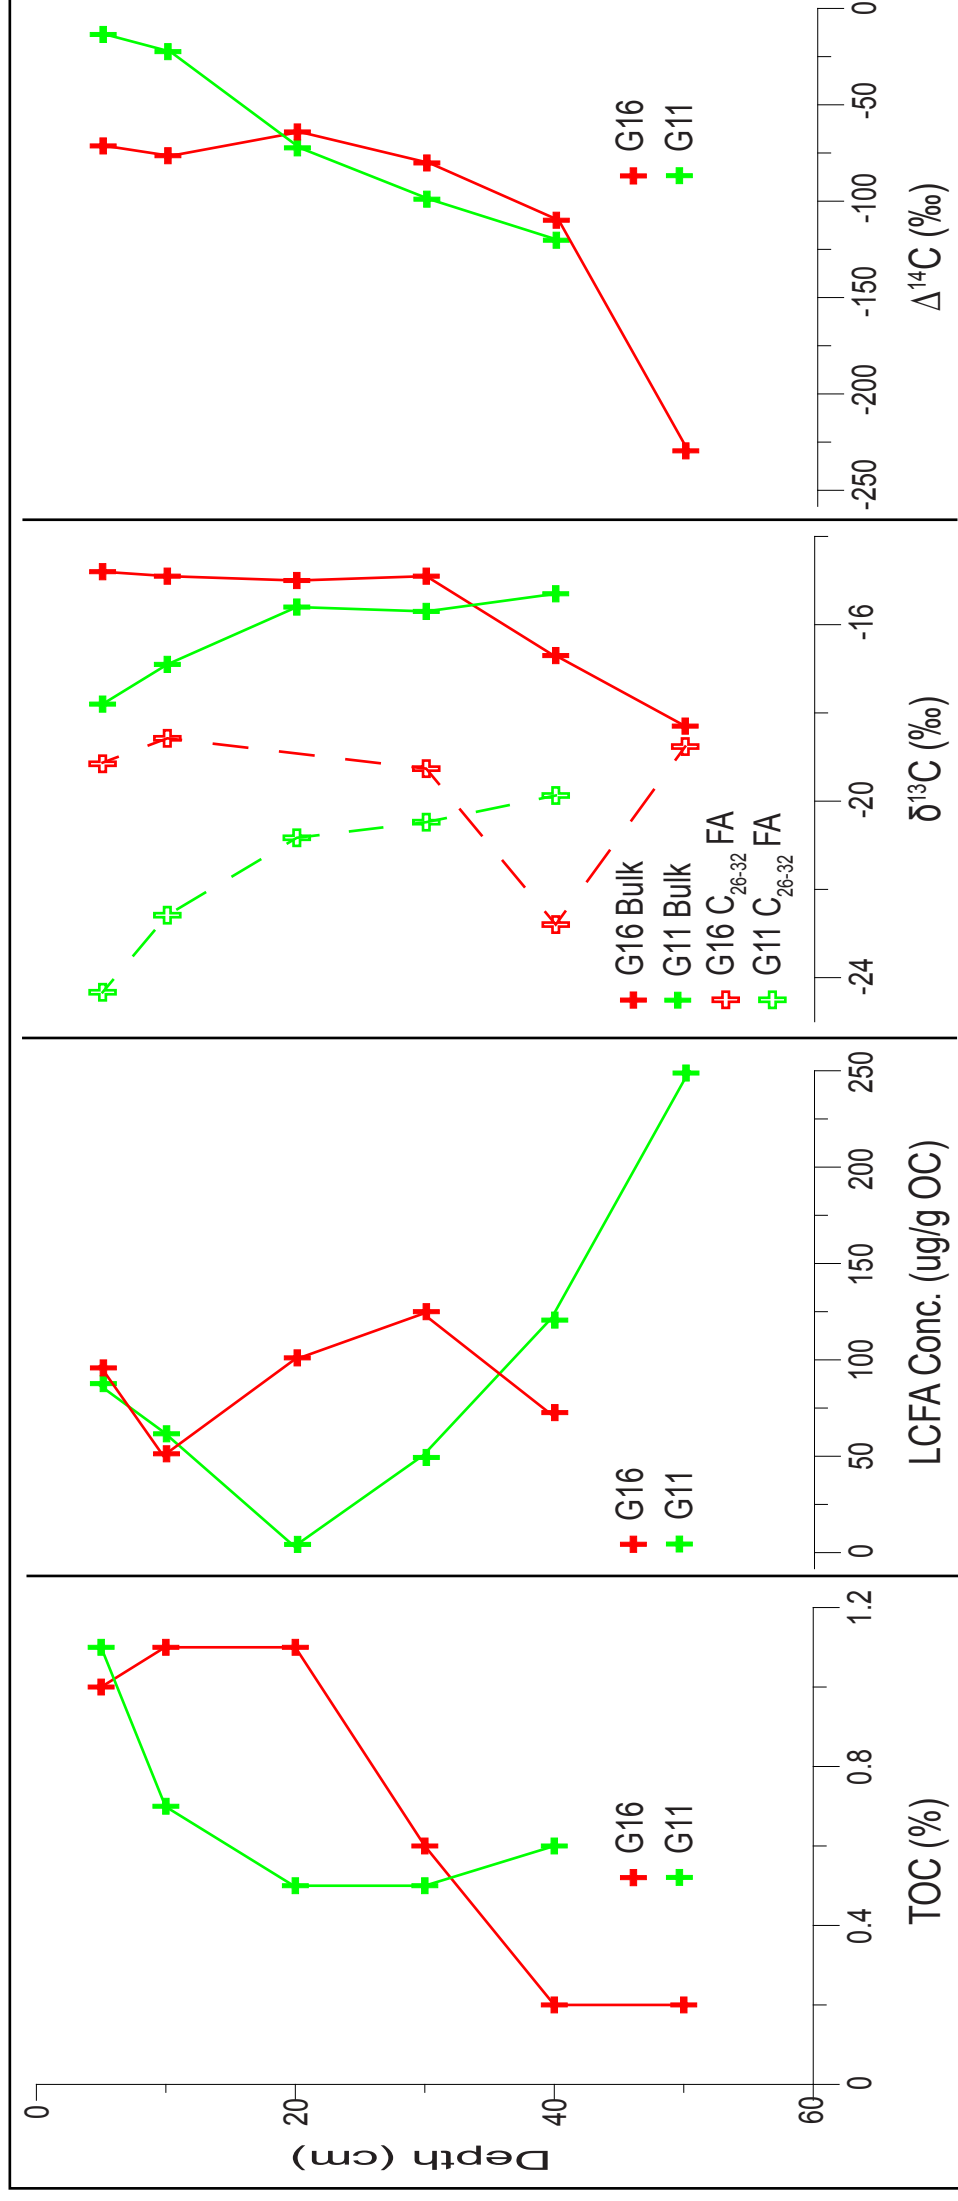

Supplement: Supplementary file 2 [file bg-15-3357-2018-supplement.zip › Fig. S2.pdf]

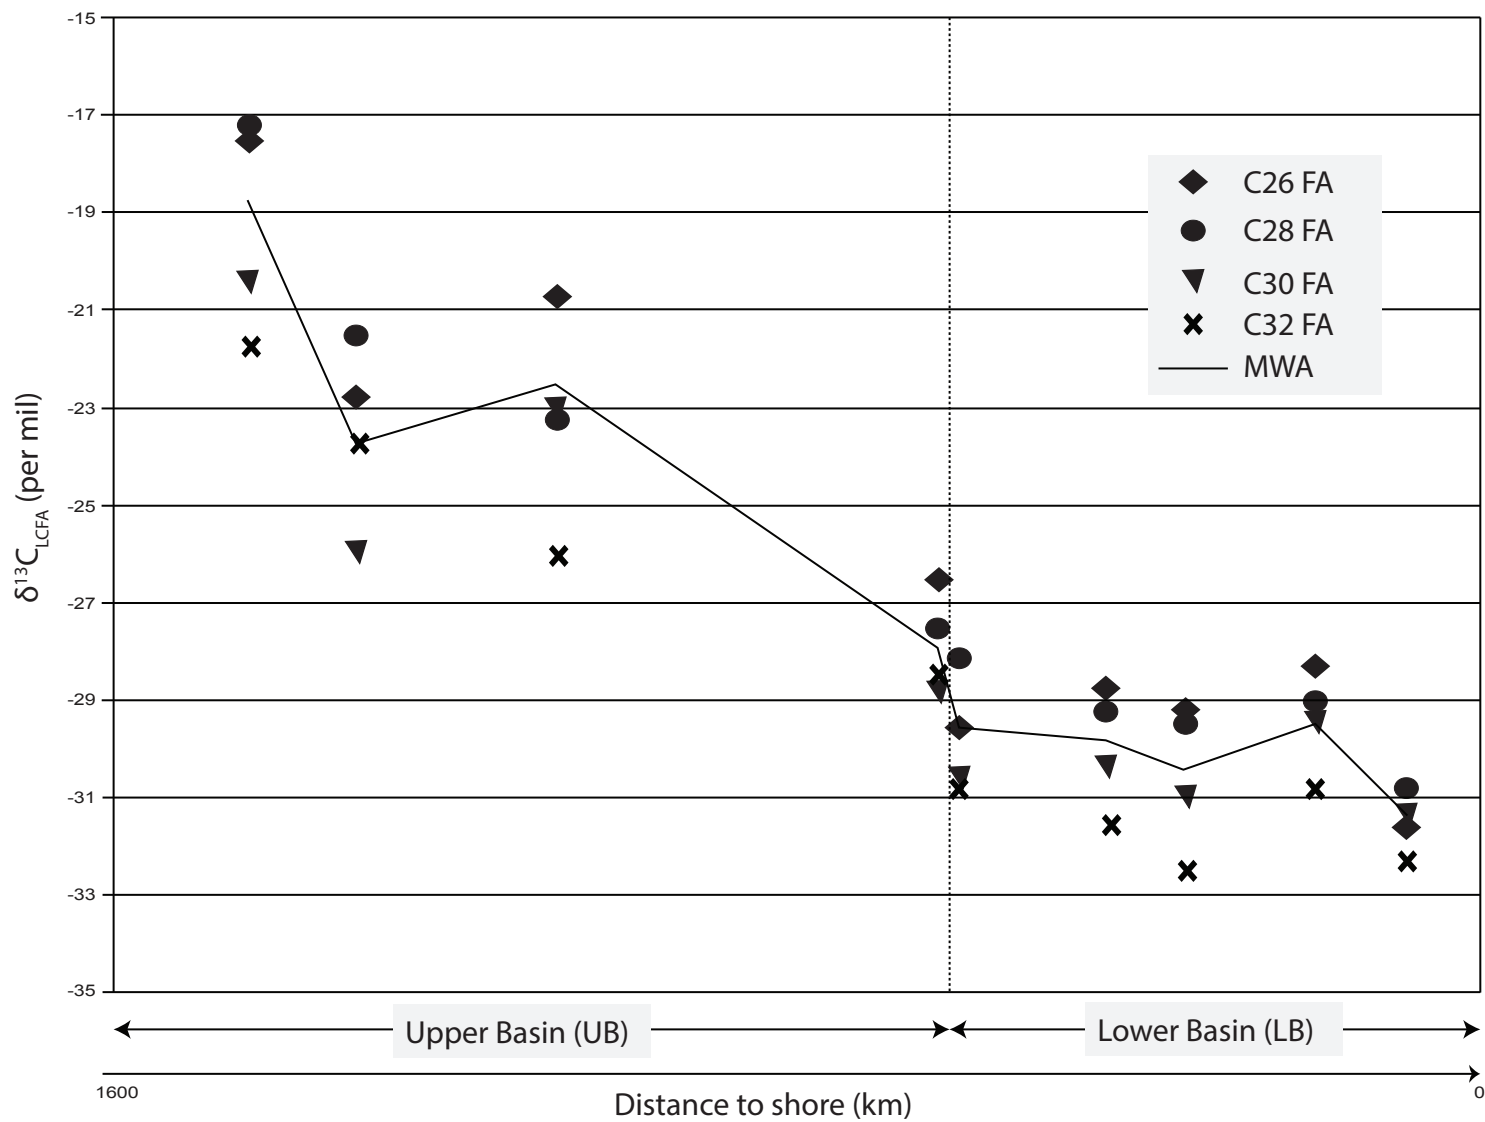

Supplement: Supplementary file 2 [file bg-15-3357-2018-supplement.zip › Fig. S1.pdf]
